# Supplementary material
Source: publisher figshare collection journal article supplement (https://gsajournals.figshare.com/articles/dataset/_/27205536)
Supplement: Supplementary file 1 [file 1]

# Package ‘SimPlus’

October 4, 2024

**Title** Functions to enhance AlphaSimR

**Version** 0.06

**Author** Jeffrey B. Endelman

**Maintainer** Jeffrey Endelman <endelman@wisc.edu>

**Description** Functions to enhance AlphaSimR

**Depends** R (>= 4.1)

**License** GPL-3

**LazyData** true

**RoxygenNote** 7.2.3

**Encoding** UTF-8

**Imports** utils, AlphaSimR, dplyr, polyBreedR, pedigree, data.table, COMA

**Suggests** knitr, rmarkdown, StageWise

**VignetteBuilder** knitr

## R topics documented:

|                         |          |
|-------------------------|----------|
| sim_accuracy . . . . .  | 2        |
| sim_load . . . . .      | 2        |
| sim_mate . . . . .      | 3        |
| sim_OCS . . . . .       | 3        |
| sim_OMA . . . . .       | 4        |
| sim_save . . . . .      | 5        |
| sim_StageWise . . . . . | 5        |
| update_K . . . . .      | 6        |
| update_TP . . . . .     | 7        |
| <b>Index</b>            | <b>8</b> |

---

sim\_accuracy                      *Estimate selection accuracy*

---

### Description

Estimate selection accuracy

### Usage

```
sim_accuracy(pop, SP, COMA.file, K.file = NULL, n.mate = 100, n.progeny = 50)
```

### Arguments

|           |                                          |
|-----------|------------------------------------------|
| pop       | parental candidates, AlphaSimR Pop-class |
| SP        | simulation parameters for AlphaSimR      |
| COMA.file | COMA filename                            |
| K.file    | kinship filename for COMA                |
| n.mate    | number of matings to sample              |
| n.progeny | number of progeny per mating             |

### Value

list of accuracies for OCS and OMA

---

sim\_load                              *Load simulation files*

---

### Description

Load simulation files

### Usage

```
sim_load(rda.file, geno.file, pheno.file, ped.file)
```

### Arguments

|            |                        |
|------------|------------------------|
| rda.file   | R data filename        |
| geno.file  | genotype CSV file      |
| pheno.file | phenotype CSV filename |
| ped.file   | pedigree CSV filename  |

### Value

list containing pop,SP,p.ref

---

sim\_mate                      *Perform mating in AlphaSimR*

---

### Description

Perform mating in AlphaSimR

### Usage

```
sim_mate(pop, SP, matings, total.progeny, min.progeny)
```

### Arguments

|               |                                                                      |
|---------------|----------------------------------------------------------------------|
| pop           | parental candidates, AlphaSimR Pop-class                             |
| SP            | simulation parameters for AlphaSimR                                  |
| matings       | data frame of mate allocations, with columns parent1, parent2, value |
| total.progeny | total progeny to generate                                            |
| min.progeny   | minimum progeny per mating                                           |

### Details

Details

### Value

list containing

**progeny** Pop-class of progeny

**matings** matings with additional column for mu

---

sim\_OCS                      *Parent selection and mating by OCS in AlphaSimR*

---

### Description

Parent selection and mating by OCS in AlphaSimR

### Usage

```
sim_OCS(pop, SP, n.progeny, dF, COMA.file, K.file, solver = "ECOS")
```

### Arguments

|           |                                          |
|-----------|------------------------------------------|
| pop       | parental candidates, AlphaSimR Pop-class |
| SP        | simulation parameters for AlphaSimR      |
| n.progeny | number of progeny to simulate            |
| dF        | target inbreeding rate                   |
| COMA.file | marker effect or pheno filename for COMA |
| K.file    | kinship filename for COMA                |
| solver    | CVXR solver                              |

**Details**

Auto detects whether COMA.file has marker effects or phenotype data based on the first column name.

**Value**

list containing

**response** named vector with realized dF, merit, Shannon diversity

**oc** data frame of optimal contributions for each individual

**om** data frame of optimal allocations for each mating

---

 sim\_OMA

---

*Parent selection and mating by OMA in AlphaSimR*


---

**Description**

Parent selection and mating by OMA in AlphaSimR

**Usage**

```
sim_OMA(pop, SP, n.progeny, dF, COMA.file, K.file, max.parent, solver = "ECOS")
```

**Arguments**

|            |                                             |
|------------|---------------------------------------------|
| pop        | parental candidates, AlphaSimR Pop-class    |
| SP         | simulation parameters for AlphaSimR         |
| n.progeny  | number of progeny to simulate               |
| dF         | target inbreeding rate                      |
| COMA.file  | geno filename for COMA                      |
| K.file     | kinship filename for COMA                   |
| max.parent | maximum number of candidate parents for oma |
| solver     | CVXR solver                                 |

**Details**

Argument dF is a numeric vector of length 2, for lower and upper bounds on inbreeding rate.

Parent pre-selection is done with ocs to satisfy the max.parent limit for oma.

**Value**

list containing

**response** named vector with realized dF, merit, Shannon diversity

**oc** data frame of optimal contributions for each individual

**om** data frame of optimal allocations for each mating

---

|          |                              |
|----------|------------------------------|
| sim_save | <i>Save simulation files</i> |
|----------|------------------------------|

---

**Description**

Save simulation files

**Usage**

```
sim_save(rda.file, pop, SP, geno.file, pheno.file, ped.file, p.ref)
```

**Arguments**

|            |                                          |
|------------|------------------------------------------|
| rda.file   | R data filename                          |
| pop        | variable of AlphaSimR Pop-class          |
| SP         | simulation parameters for AlphaSimR      |
| geno.file  | genotype CSV file                        |
| pheno.file | phenotype CSV filename                   |
| ped.file   | pedigree CSV filename                    |
| p.ref      | reference allele frequencies (for G.VR1) |

---

|               |                                             |
|---------------|---------------------------------------------|
| sim_StageWise | <i>Estimate marker effects by StageWise</i> |
|---------------|---------------------------------------------|

---

**Description**

Estimate marker effects by StageWise

**Usage**

```
sim_StageWise(
  geno.file,
  pheno.file,
  ploidy,
  COMA.file,
  gen.TP,
  asreml.workspace = "500mb"
)
```

**Arguments**

|                  |                                                  |
|------------------|--------------------------------------------------|
| geno.file        | TP genotype CSV filename                         |
| pheno.file       | TP phenotype CSV filename                        |
| ploidy           | ploidy                                           |
| COMA.file        | input filename for COMA                          |
| gen.TP           | number of generations for TP (including current) |
| asreml.workspace | memory workspace                                 |

**Details**

Details

**Value**

list of dominance parameters

---

|          |                            |
|----------|----------------------------|
| update_K | <i>Update kinship file</i> |
|----------|----------------------------|

---

**Description**

Update kinship file

**Usage**

```
update_K(
  pop,
  SP,
  K.method,
  K.file,
  ped.file = NULL,
  p.ref = NULL,
  ibd.loci = 100,
  n.core = 1
)
```

**Arguments**

|          |                                                  |
|----------|--------------------------------------------------|
| pop      | variable of AlphaSimR Pop-class                  |
| SP       | simulation parameters for AlphaSimR              |
| K.method | kinship method: A, G, G.IBD                      |
| K.file   | kinship CSV filename                             |
| ped.file | pedigree CSV filename                            |
| p.ref    | reference pop allele frequencies for "G" method  |
| ibd.loci | number of loci per chromosome for "G.IBD" method |
| n.core   | number cores for "G.IBD" method                  |

**Details**

Kinship is computed for selection candidates in pop. For K.method="A", argument ped.file is the three-column pedigree file. K.method="G" specifies VanRaden Method 1, and argument p.ref is the vector of reference allele frequencies. To reduce computing time for K.method="G.IBD", only ibd.loci are sampled per chromosome.

**Value**

average inbreeding coefficient of the population

---

|           |                                            |
|-----------|--------------------------------------------|
| update_TP | <i>Update the Training Population (TP)</i> |
|-----------|--------------------------------------------|

---

**Description**

Update genotype, genotyped, and pedigree files for the TP

**Usage**

```
update_TP(pop, SP, geno.file, pheno.file, ped.file, gen.TP)
```

**Arguments**

|            |                                                       |
|------------|-------------------------------------------------------|
| pop        | variable of AlphaSimR Pop-class                       |
| SP         | simulation parameters for AlphaSimR                   |
| geno.file  | genotype CSV file                                     |
| pheno.file | phenotype CSV filename                                |
| ped.file   | pedigree CSV filename                                 |
| gen.TP     | # generations recorded for the TP (including current) |

**Details**

Pedigree file has three columns: id, mother, father. Phenotype file has three columns: id, value, gen.  
To start a new TP, use gen.TP = 0.

**Value**

vector of allele frequencies for pop if gen.TP==0, otherwise NULL

# Index

sim\_accuracy, 2  
sim\_load, 2  
sim\_mate, 3  
sim\_OCS, 3  
sim\_OMA, 4  
sim\_save, 5  
sim\_StageWise, 5  
  
update\_K, 6  
update\_TP, 7
